# Supplementary material for: Awareness and Perceptions of AR/VR in Dentistry: A Cross-Sectional Study Among Turkish Dental Students
Source: Research Square preprint supplement (doi:10.21203/rs.3.rs-7425749/v1), 2025-10-31
Supplement: Supplementary file 1 [file e696b4e539ce2f24e27f060e.docx]

1. **Bu anketi yapmadan önce diş hekimliğinde AR/VR teknolojisinin kullanıldığını duydunuz mu?**

- Evet

- Hayır

2. **Diş hekimliği pratiğinizde veya eğitiminizde hiç VR teknolojisini kullandınız mı?**

- Evet

- Hayır

3. **Diş hekimliği pratiğinizde veya eğitiminizde hiç AR teknolojisini kullandınız mı?**

- Evet

- Hayır

4. **Diş sağlığı alanında VR veya AR üzerine bir atölye, seminer veya eğitim oturumuna katıldınız mı?**

- Evet

- Hayır

5. **Diş sağlığı alanında VR ve AR ile ilgili araştırma çalışmaları veya denemelere katılmaya açık olur muydunuz?**

- Evet

- Hayır

6. **Diş sağlığı alanında VR ve AR kullanımına yönelik eğitim almakla ilgilenir misiniz?**

- Evet

- Hayır

7. **Diş eğitimi veya uygulaması için tasarlanmış herhangi bir VR veya AR uygulamasından haberdar mısınız?**

- Evet

- Hayır
